# Supplementary material
Source: PubMed Central journal article supplement (PMC1200586)
Supplement: bmj_331_7516_541__1.pdf [file bmj_331_7516_541__1.pdf]

## **Affiliations of UKATT Research Team members**

**Institute of Medical and Social Care Research, University of Wales Bangor, Gwynedd,  
LL57 2UW**

Ian Russell

*director*

**School of Psychology, University of Birmingham, Birmingham B15 2TT**

Jim Orford

*professor of clinical and community psychology*

**Centre for Psychology, University of Wales Institute Cardiff**

Tina Alwyn

*lecturer*

**School of Psychology, University of Exeter**

Rachel Black

*trainee clinical psychologist*

**Substance Misuse Services, Birmingham and Solihull Mental Health NHS Trust**

Alex Copello

*clinical director*

**Department of Health Sciences, University of York**

Simon Coulton

*research fellow*

Amanda Farrin

*research fellow*

Christine Godfrey

*professor of health economics*

Veronica Morton

*research fellow*

**Leeds Addiction Unit, Leeds Mental Health NHS Trust**

Olwyn Finnegan

*research fellow*

Linda Handforth

*research fellow*

Wendy Middleton

*research fellow*

Duncan Raistrick

*director*

Gill Thistlethwaite

*research fellow*

Gillian Tober

*deputy clinical director*

Alison Westwood  
*research fellow*

**Sheffield Institute for Studies on Ageing, Northern General Hospital, Sheffield**  
Kate Fryer  
*research fellow*

**School of Psychology and Sport Sciences, Northumbria University**  
Nick Heather  
*emeritus professor*

Alcohol Education and Research Council, London  
Ray Hodgson  
*director*

**Centre for Interprofessional Studies, University of Wales Institute Cardiff**  
Bev John  
*lecturer*

**Department of Primary Care and Population Sciences, Royal Free and University  
College Medical School, University College London**  
Cicely Kerr  
*research fellow*

**Centre for Health Economics, University of York**  
Steve Parrott  
*research fellow*

**North Wales Section of Psychological Medicine, Institute of Medical and Social Care  
Research, University of Wales Bangor**  
Gary Slegg  
*research fellow*

**Academic Division of Clinical Psychology, University of Manchester**  
Melanie Smith  
*trainee clinical psychologist*

### **Collaborators**

Alan Atkinson, Clive Barrett, and Robert Kenyon (**Leeds Addiction Unit, Leeds Mental  
Health NHS Trust**)  
Pauline Chalk (**North Birmingham Community Alcohol Team**)  
Jeff Champney-Smith and Andrew McBride (**Cardiff Community Addiction Unit**)  
Illana Crome and Sue Parkes (**Community Alcohol Team Addiction Services,  
Wolverhampton**)  
Rhoda Emlyn-Jones (**Cardiff Community Alcohol Team**)

Annette Fleming (**Aquarius Action Projects, Birmingham**)

Ash Kahn (North Birmingham Mental Health Trust)

Zelda Summers and Paul Williams (**Community Drug and Alcohol Team, Mid-Glamorgan**)
